# Supplementary material
Source: publisher figshare collection journal article supplement (https://frontiersin.figshare.com/ndownloader/files/26672486)
Supplement: Supplementary file [file 26672486]

**High**  
educational level

**Low**  
educational level

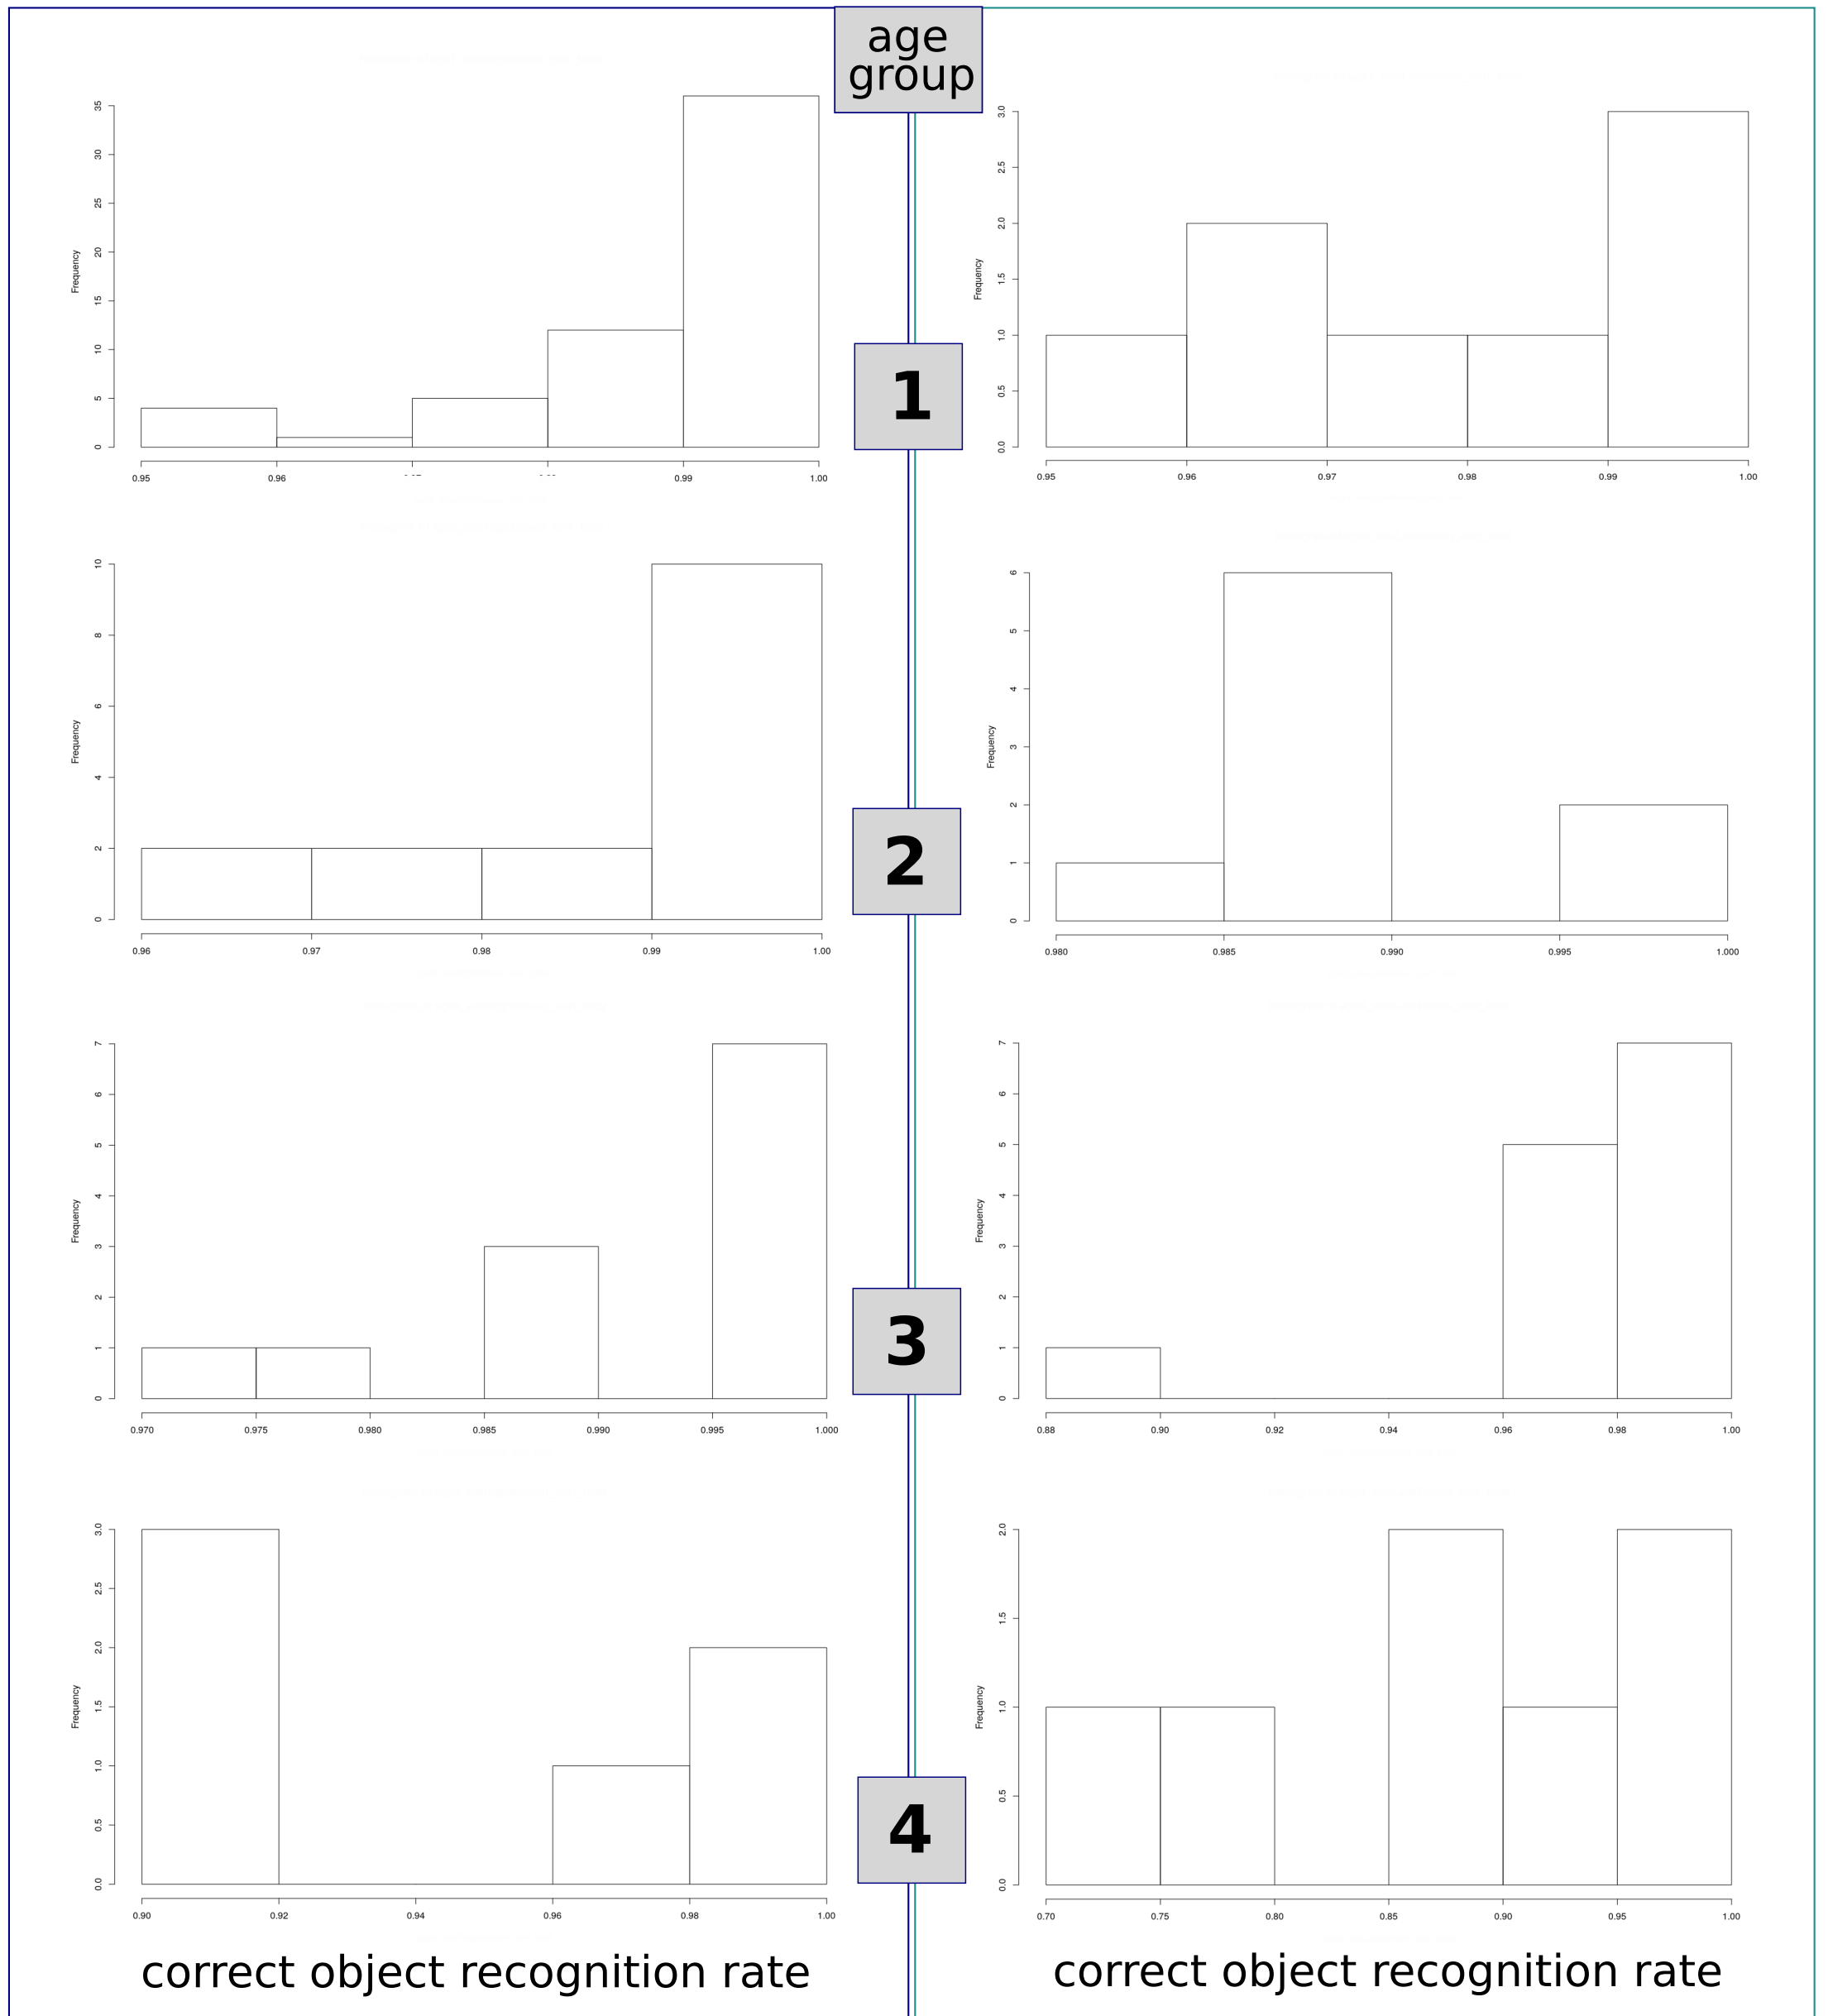

**Supplementary Figure S1. Correct object recognition by age groups and educational levels.** The histograms show the data distribution ranging from a skewed distribution in younger subjects of high educational level to a larger variance with normal data distribution in less educated elderly. Left column: high educational level; right column: low educational level; rows: age categories from 1 (first row) to 4 (last row).
